# Supplementary material for: LMO1 super-enhancer polymorphism rs2168101 G>T correlates with decreased neuroblastoma risk in Chinese children
Source: PubMed Central journal article supplement — J Cancer. 2018 Apr 12;9(9):1592–7. doi: 10.7150/jca.24326 (PMC5950588; doi:10.7150/jca.24326), 2018-04-12
Supplement: jcav09p1592s1.pdf [file jcav09p1592s1.pdf]

**Supplemental Table 1.** Frequency distribution of selected characteristics in neuroblastoma patients and cancer-free controls

| Variables              | Guangdong province |       |                  |       | Henan province |       |                  |       |                       |       |
|------------------------|--------------------|-------|------------------|-------|----------------|-------|------------------|-------|-----------------------|-------|
|                        | Cases (N=256)      |       | Controls (N=531) |       | Cases (N=118)  |       | Controls (N=281) |       | <i>P</i> <sup>a</sup> |       |
|                        | No.                | %     | No.              | %     | No.            | %     | No.              | %     |                       |       |
| Age range, month       | 0-156              |       | 0.07-156         |       | 0-131.1        |       | 0.1-144.0        |       | 0.239                 |       |
| Mean ± SD              | 30.87 ± 26.45      |       | 29.73 ± 24.86    |       | 46.24 ± 29.98  |       | 44.97 ± 33.23    |       |                       |       |
| ≤18                    | 101                | 39.45 | 233              | 43.88 | 23             | 19.49 | 72               | 25.62 |                       |       |
| >18                    | 155                | 60.55 | 298              | 56.12 | 95             | 80.51 | 209              | 74.38 |                       |       |
| Gender                 |                    |       |                  |       |                |       |                  |       | 0.333                 | 0.196 |
| Female                 | 103                | 40.23 | 233              | 43.88 | 54             | 45.76 | 109              | 38.79 |                       |       |
| Male                   | 153                | 59.77 | 298              | 56.12 | 64             | 54.24 | 172              | 61.21 |                       |       |
| Clinical stages        |                    |       |                  |       |                |       |                  |       |                       |       |
| I                      | 54                 | 21.09 |                  |       | 15             | 12.71 |                  |       |                       |       |
| II                     | 65                 | 25.39 |                  |       | 31             | 26.27 |                  |       |                       |       |
| III                    | 44                 | 17.19 |                  |       | 19             | 16.10 |                  |       |                       |       |
| IV                     | 77                 | 30.08 |                  |       | 49             | 41.53 |                  |       |                       |       |
| 4s                     | 9                  | 3.52  |                  |       | 3              | 2.54  |                  |       |                       |       |
| NA                     | 7                  | 2.73  |                  |       | 1              | 0.85  |                  |       |                       |       |
| Sites of origin        |                    |       |                  |       |                |       |                  |       |                       |       |
| Adrenal gland          | 46                 | 17.97 |                  |       | 89             | 75.42 |                  |       |                       |       |
| Retroperitoneal region | 87                 | 33.98 |                  |       | /              | /     |                  |       |                       |       |
| Mediastinum            | 90                 | 35.16 |                  |       | 19             | 16.10 |                  |       |                       |       |
| Other region           | 25                 | 9.77  |                  |       | 10             | 8.47  |                  |       |                       |       |
| NA                     | 8                  | 3.13  |                  |       | /              | /     |                  |       |                       |       |

SD, standard deviation; NA, not available.

<sup>a</sup> Two-sided  $\chi^2$  test for distributions between neuroblastoma patients and cancer-free controls.

**Supplemental Table 2.** SNPs captured by the five selected *LMO1* polymorphisms as predicted by SNPinfo (<http://snpinfo.niehs.nih.gov/>) software

| rs                | Chr       | Allele     | LDsnp             | Pop/R <sup>2</sup> | TFBS Splicing<br>(ESE or ESS) | Reg<br>Potential | Conservation <sup>a</sup> | Nearby Gene  | Distance (bp)      | Allele                | Asian    | CHB          |              |
|-------------------|-----------|------------|-------------------|--------------------|-------------------------------|------------------|---------------------------|--------------|--------------------|-----------------------|----------|--------------|--------------|
| <b>rs1042359</b>  | <b>11</b> | <b>G/A</b> | <b>rs1042359</b>  | <b>1</b>           | --                            | --               | <b>0.460373</b>           | <b>1</b>     | <b>LMO1</b>        | <b>324  39225</b>     | <b>A</b> | <b>0.921</b> | <b>0.923</b> |
| rs4758053         | 11        | C/T        | rs1042359         | CHB/0.650          | --                            | --               | 0.290163                  | 0.002        | LMO1               | 3885  35664           | C        | 0.943        | 0.952        |
| rs6578942         | 11        | C/T        | rs1042359         | CHB/0.757          | --                            | --               | 0.228962                  | 0            | RIC3  LMO1         | -52598  -2687         | C        | 0.947        | 0.927        |
| rs7109806         | 11        | C/T        | rs1042359         | CHB/0.757          | --                            | --               | 0.035911                  | 0.001        | RIC3  LMO1         | -52057  -3228         | T        | 0.939        | 0.929        |
| rs7122225         | 11        | A/G        | rs1042359         | CHB/0.611          | --                            | --               | 0.142751                  | 0.002        | RIC3  LMO1         | -49246  -6039         | G        | 0.960        | 0.929        |
| rs767838          | 11        | G/T        | rs1042359         | CHB/0.741          | --                            | --               | 0.331973                  | 0.004        | RIC3  LMO1         | -53176  -2109         | G        | 0.936        | 0.911        |
| rs7933956         | 11        | C/T        | rs1042359         | CHB/0.675          | --                            | --               | 0.092952                  | 0            | LMO1               | 1274  38275           | C        | 0.939        | 0.946        |
| <b>rs11041838</b> | <b>11</b> | <b>C/G</b> | <b>rs11041838</b> | <b>1</b>           | <b>Y</b>                      | --               | <b>0.013866</b>           | <b>0.002</b> | <b>LMO1  STK33</b> | <b>-3681  -124331</b> | <b>G</b> | <b>0.500</b> | <b>0.875</b> |
| <b>rs2071458</b>  | <b>11</b> | <b>C/A</b> | <b>rs2071458</b>  | <b>1</b>           | <b>Y</b>                      | --               | <b>0.333636</b>           | <b>1</b>     | <b>LMO1</b>        | <b>39267  282</b>     | <b>C</b> | <b>0.756</b> | <b>0.774</b> |
| <b>rs2168101</b>  | <b>11</b> | <b>C/A</b> | <b>rs2168101</b>  | <b>1</b>           | --                            | --               | <b>0.316134</b>           | <b>1</b>     | <b>LMO1</b>        | <b>9551  29998</b>    | <b>C</b> | --           | --           |
| rs110419          | 11        | A/G        | rs3750952         | CHB/0.780          | --                            | --               | 0                         | 0            | LMO1               | 6996  32553           | A        | 0.634        | 0.530        |
| rs110420          | 11        | C/T        | rs3750952         | CHB/0.827          | --                            | --               | 0                         | 0            | LMO1               | 7192  32357           | T        | 0.491        | 0.545        |
| rs204926          | 11        | G/A        | rs3750952         | CHB/0.948          | --                            | --               | 0                         | 0            | LMO1               | 9249  30300           | G        | 0.640        | 0.628        |
| rs204928          | 11        | G/A        | rs3750952         | CHB/0.786          | --                            | --               | 0                         | 0.001        | LMO1               | 8576  30973           | A        | 0.614        | 0.568        |
| <b>rs3750952</b>  | <b>11</b> | <b>G/C</b> | <b>rs3750952</b>  | <b>1</b>           | --                            | <b>Y</b>         | <b>0.524312</b>           | <b>1</b>     | <b>LMO1</b>        | <b>6064  33485</b>    | <b>G</b> | <b>0.632</b> | <b>0.614</b> |
| rs4758317         | 11        | A/C        | rs3750952         | CHB/0.819          | --                            | --               | 0                         | 0            | LMO1               | 4954  34595           | A        | 0.394        | 0.464        |

SNP, single nucleotide polymorphism; LD, linkage disequilibrium; TFBS, transcription factor binding sites; ESE, exon splicing enhancer; ESS, exon splicing silencer; CHB, Han Chinese in Beijing, China.

<sup>a</sup> Conservation score (17 Species) downloaded from UCSC genome bioinformatics web site (<http://genome.ucsc.edu/>).

**Supplemental Table 3.** Stratification analysis for the association between *LMO1* gene polymorphisms and neuroblastoma susceptibility (Southern Chinese subjects)

| Variables       | rs2168101 G>T    |          | Adjusted OR <sup>b</sup> | <i>P</i> <sup>b</sup> | rs3750952 G>C    |          | Adjusted OR <sup>b</sup> | <i>P</i> <sup>b</sup> | Protective genotypes <sup>a</sup> |          |                          |                       |
|-----------------|------------------|----------|--------------------------|-----------------------|------------------|----------|--------------------------|-----------------------|-----------------------------------|----------|--------------------------|-----------------------|
|                 | GG               | GT/TT    |                          |                       | GG               | GC/CC    |                          |                       | 0-1                               | 2-5      | Adjusted OR <sup>b</sup> | <i>P</i> <sup>b</sup> |
|                 | (Cases/Controls) | (95% CI) |                          |                       | (Cases/Controls) | (95% CI) |                          |                       | (Cases/Controls)                  | (95% CI) | (95% CI)                 |                       |
| Age, month      |                  |          |                          |                       |                  |          |                          |                       |                                   |          |                          |                       |
| ≤18             | 62/128           | 39/105   | 0.76 (0.47-1.22)         | 0.256                 | 51/122           | 50/111   | 1.07 (0.67-1.71)         | 0.779                 | 45/99                             | 56/134   | 0.92 (0.58-1.47)         | 0.730                 |
| >18             | 104/147          | 50/151   | <b>0.47 (0.31-0.70)</b>  | <b>0.0002</b>         | 96/131           | 58/167   | <b>0.48 (0.32-0.71)</b>  | <b>0.0003</b>         | 84/119                            | 70/179   | <b>0.55 (0.37-0.82)</b>  | <b>0.003</b>          |
| Gender          |                  |          |                          |                       |                  |          |                          |                       |                                   |          |                          |                       |
| Females         | 69/126           | 34/107   | <b>0.58 (0.36-0.94)</b>  | <b>0.026</b>          | 57/116           | 46/117   | 0.80 (0.50-1.27)         | 0.342                 | 51/98                             | 52/135   | 0.74 (0.47-1.18)         | 0.209                 |
| Males           | 97/149           | 55/149   | <b>0.57 (0.38-0.85)</b>  | <b>0.006</b>          | 90/137           | 62/101   | <b>0.59 (0.40-0.87)</b>  | <b>0.008</b>          | 78/120                            | 74/178   | <b>0.64 (0.43-0.95)</b>  | <b>0.026</b>          |
| Sites of origin |                  |          |                          |                       |                  |          |                          |                       |                                   |          |                          |                       |
| Adrenal gland   | 35/275           | 10/256   | <b>0.30 (0.15-0.62)</b>  | <b>0.001</b>          | 30/253           | 15/278   | <b>0.44 (0.23-0.85)</b>  | <b>0.014</b>          | 24/218                            | 21/313   | 0.60 (0.33-1.11)         | 0.106                 |
| Retroperitoneal | 53/275           | 34/256   | 0.68 (0.43-1.09)         | 0.109                 | 43/253           | 44/278   | 0.92 (0.59-1.45)         | 0.729                 | 38/218                            | 49/313   | 0.90 (0.57-1.42)         | 0.645                 |
| Mediastinum     | 60/275           | 30/256   | <b>0.54 (0.34-0.87)</b>  | <b>0.011</b>          | 57/253           | 33/278   | <b>0.53 (0.34-0.84)</b>  | <b>0.007</b>          | 55/218                            | 35/313   | <b>0.45 (0.28-0.70)</b>  | <b>0.0005</b>         |
| Others          | 16/275           | 9/256    | 0.61 (0.26-1.40)         | 0.243                 | 14/253           | 11/278   | 0.73 (0.33-1.65)         | 0.454                 | 10/218                            | 15/313   | 1.06 (0.47-2.40)         | 0.897                 |
| Clinical stages |                  |          |                          |                       |                  |          |                          |                       |                                   |          |                          |                       |
| I+II+4s         | 73/275           | 45/256   | <b>0.66 (0.44-0.997)</b> | <b>0.048</b>          | 62/253           | 56/278   | 0.82 (0.55-1.23)         | 0.343                 | 56/218                            | 62/313   | 0.77 (0.52-1.15)         | 0.204                 |
| III+IV          | 81/275           | 40/256   | <b>0.52 (0.34-0.78)</b>  | <b>0.002</b>          | 74/253           | 47/278   | <b>0.56 (0.37-0.84)</b>  | <b>0.005</b>          | 62/218                            | 59/313   | <b>0.65 (0.44-0.98)</b>  | <b>0.037</b>          |

OR, odds ratio; CI, confidence interval.

<sup>a</sup>Protective genotypes that reduced neuroblastoma risk were rs2168101 GT/TT, rs1042359 AG/GG, rs11041838 GG, rs2071458 CA/AA, and rs3750952 GC/CC.

<sup>b</sup>Adjusted for age and gender, omitting the corresponding stratification factor.

**Supplemental Table 4.** Stratification analysis for the association between *LMO1* gene polymorphisms and neuroblastoma susceptibility (Northern Chinese subjects)

| Variables       | rs2168101 G>T    |                  | Adjusted OR <sup>b</sup><br>(95% CI) | <i>P</i> <sup>b</sup> | rs3750952 G>C    |                  | Adjusted OR <sup>b</sup><br>(95% CI) | <i>P</i> <sup>b</sup> | Protective genotypes <sup>a</sup> |                  |                          |                       |
|-----------------|------------------|------------------|--------------------------------------|-----------------------|------------------|------------------|--------------------------------------|-----------------------|-----------------------------------|------------------|--------------------------|-----------------------|
|                 | GG               | GT/TT            |                                      |                       | GG               | GC/CC            |                                      |                       | 0-1                               | 2-5              | Adjusted OR <sup>b</sup> | <i>P</i> <sup>b</sup> |
|                 | (Cases/Controls) | (Cases/Controls) |                                      |                       | (Cases/Controls) | (Cases/Controls) |                                      |                       | (Cases/Controls)                  | (Cases/Controls) | (95% CI)                 | (95% CI)              |
| Age, month      |                  |                  |                                      |                       |                  |                  |                                      |                       |                                   |                  |                          |                       |
| ≤18             | 15/30            | 8/42             | 0.38 (0.14-1.02)                     | 0.056                 | 13/24            | 10/48            | 0.40 (0.15-1.04)                     | 0.060                 | 13/19                             | 10/53            | <b>0.28 (0.11-0.75)</b>  | <b>0.011</b>          |
| >18             | 64/102           | 31/107           | <b>0.44 (0.26-0.74)</b>              | <b>0.002</b>          | 52/96            | 43/113           | 0.67 (0.41-1.10)                     | 0.114                 | 42/70                             | 53/139           | 0.63 (0.38-1.04)         | 0.070                 |
| Gender          |                  |                  |                                      |                       |                  |                  |                                      |                       |                                   |                  |                          |                       |
| Females         | 38/40            | 16/69            | <b>0.25 (0.12-0.51)</b>              | <b>0.0001</b>         | 31/36            | 23/73            | <b>0.38 (0.19-0.74)</b>              | <b>0.005</b>          | 30/29                             | 24/80            | <b>0.30 (0.15-0.59)</b>  | <b>0.0005</b>         |
| Males           | 41/92            | 23/80            | 0.66 (0.36-1.20)                     | 0.171                 | 34/84            | 30/88            | 0.89 (0.50-1.59)                     | 0.691                 | 25/60                             | 39/112           | 0.88 (0.48-1.61)         | 0.680                 |
| Sites of origin |                  |                  |                                      |                       |                  |                  |                                      |                       |                                   |                  |                          |                       |
| Adrenal gland   | 60/132           | 29/149           | <b>0.40 (0.24-0.67)</b>              | <b>0.0005</b>         | 47/120           | 42/161           | 0.64 (0.39-1.03)                     | 0.068                 | 39/89                             | 50/192           | <b>0.59 (0.36-0.96)</b>  | <b>0.032</b>          |
| Mediastinum     | 14/132           | 5/149            | <b>0.29 (0.10-0.83)</b>              | <b>0.021</b>          | 14/120           | 5/161            | <b>0.25 (0.09-0.71)</b>              | <b>0.009</b>          | 12/89                             | 7/192            | <b>0.27 (0.10-0.70)</b>  | <b>0.008</b>          |
| Others          | 5/132            | 5/149            | 0.90 (0.25-3.23)                     | 0.867                 | 4/120            | 6/161            | 1.16 (0.31-4.30)                     | 0.828                 | 4/89                              | 6/192            | 0.73 (0.20-2.68)         | 0.630                 |
| Clinical stages |                  |                  |                                      |                       |                  |                  |                                      |                       |                                   |                  |                          |                       |
| I+II+4s         | 31/132           | 16/149           | <b>0.43 (0.22-0.82)</b>              | <b>0.011</b>          | 28/120           | 19/161           | <b>0.47 (0.25-0.89)</b>              | <b>0.020</b>          | 25/89                             | 22/192           | <b>0.39 (0.21-0.74)</b>  | <b>0.004</b>          |
| III+IV          | 46/132           | 22/149           | <b>0.40 (0.23-0.71)</b>              | <b>0.002</b>          | 36/120           | 32/161           | 0.64 (0.37-1.10)                     | 0.104                 | 29/89                             | 39/192           | 0.62 (0.36-1.07)         | 0.086                 |

OR, odds ratio; CI, confidence interval.

<sup>a</sup> Protective genotypes that reduced neuroblastoma risk were rs2168101 GT/TT, rs1042359 AG/GG, rs11041838 GG, rs2071458 CA/AA, and rs3750952 GC/CC.<sup>b</sup> Adjusted for age and gender, omitting the corresponding stratification factor.
